# Supplementary material
Source: Springer Nature journal article supplement (https://www.springermedizin.de/resource/supplementary/12885_2012_3740_MOESM2_ESM.pdf/9465984)

A

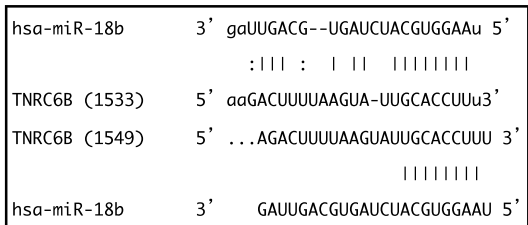

B

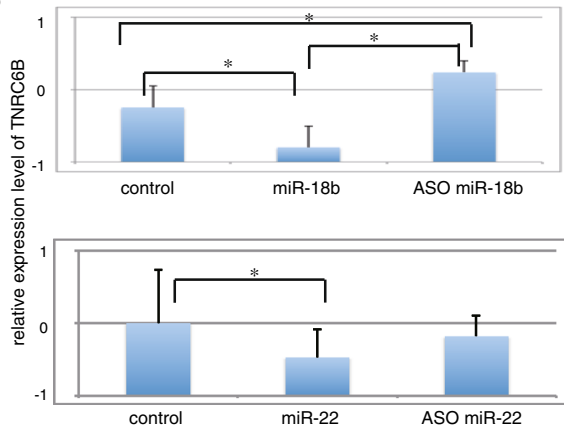

C

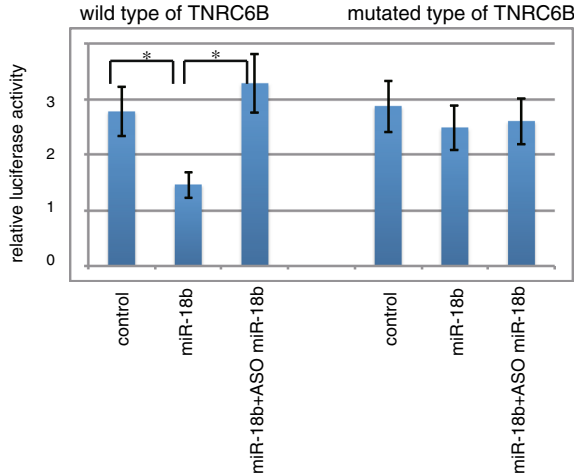

D

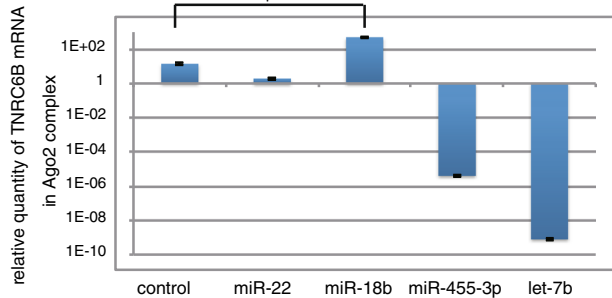

Supplement: MOESM2 [file 9465984]
